# Supplementary material
Source: PubMed Central journal article supplement (PMC5783660)

**Note to readers with disabilities:** *EHP* strives to ensure that all journal content is accessible to all readers. However, some figures and Supplemental Material published in *EHP* articles may not conform to [508 standards](#) due to the complexity of the information being presented. If you need assistance accessing journal content, please contact [ehp508@niehs.nih.gov](mailto:ehp508@niehs.nih.gov). Our staff will work with you to assess and meet your accessibility needs within 3 working days.

### **Supplemental Table**

#### **Outdoor Light at Night and Breast Cancer Incidence in the Nurses' Health Study II**

Peter James, Kimberly A. Bertrand, Jaime E. Hart, Eva Schernhammer, Rulla M. Tamimi,  
and Francine Laden

#### **Table of Contents**

**Table S1.** Cumulative average LAN and breast cancer risk by tumor estrogen receptor status in NHSII (N=109,672)<sup>a</sup>

**Figure S1.** Stratified analyses. Hazard ratios and 95% CIs presented for an IQR increase in cumulative average LAN (31.6 nW/cm<sup>2</sup>/sr)

**Supplemental Table S1.** Cumulative average LAN and breast cancer risk by tumor estrogen receptor status in NHSII (N=109,672)<sup>a</sup>

| Exposure                                               | ER Positive |                                         | ER Negative |                                         |
|--------------------------------------------------------|-------------|-----------------------------------------|-------------|-----------------------------------------|
|                                                        | Cases (N)   | Fully Adjusted HR (95% CI) <sup>b</sup> | Cases (N)   | Fully Adjusted HR (95% CI) <sup>b</sup> |
| LAN Quintile 1<br>(Median 4.3 nW/cm <sup>2</sup> /sr)  | 325         | Ref                                     | 96          | Ref                                     |
| LAN Quintile 2<br>(Median 12.4 nW/cm <sup>2</sup> /sr) | 434         | 1.13 (0.97, 1.30)                       | 105         | 0.92 (0.69, 1.23)                       |
| LAN Quintile 3<br>(Median 22.9 nW/cm <sup>2</sup> /sr) | 433         | 1.08 (0.93, 1.26)                       | 95          | 0.80 (0.59, 1.08)                       |
| LAN Quintile 4<br>(Median 37.2 nW/cm <sup>2</sup> /sr) | 476         | 1.16 (1.00, 1.35)                       | 111         | 0.93 (0.70, 1.25)                       |
| LAN Quintile 5<br>(Median 64.0 nW/cm <sup>2</sup> /sr) | 469         | 1.20 (1.02, 1.40)                       | 105         | 0.94 (0.69, 1.29)                       |
| P for Trend                                            |             | 0.06                                    |             | 0.86                                    |
| Continuous LAN (per IQR increase <sup>c</sup> )        |             | 1.06 (0.99, 1.13)                       |             | 0.98 (0.85, 1.13)                       |
| P for Heterogeneity <sup>d</sup>                       |             |                                         | 0.33        |                                         |

<sup>a</sup> There were 900 cases with missing data on ER status; These participants contributed person-time to this analysis, but were censored at the time of an event

<sup>b</sup> Hazard ratios are adjusted for benign breast disease history, family history of breast cancer, age at menarche, parity and age at first birth, height, white race, BMI, BMI at age 18, OC use, mammography screening, menopausal status, smoking status, alternative healthy eating index, physical activity, marital status, living alone, personal income, shift work after 1989, region, PM<sub>2.5</sub>, Census tract median home value, income, and population density

<sup>c</sup> An IQR increase in cumulative average LAN is 31.6 nW/cm<sup>2</sup>/sr

<sup>d</sup> P for heterogeneity estimated using the contrast test method (Wang et al. 2016)

**Supplemental Figure S1.** Stratified analyses. Hazard ratios and 95% CIs presented for an IQR increase in cumulative average LAN (31.6 nW/cm<sup>2</sup>/sr)

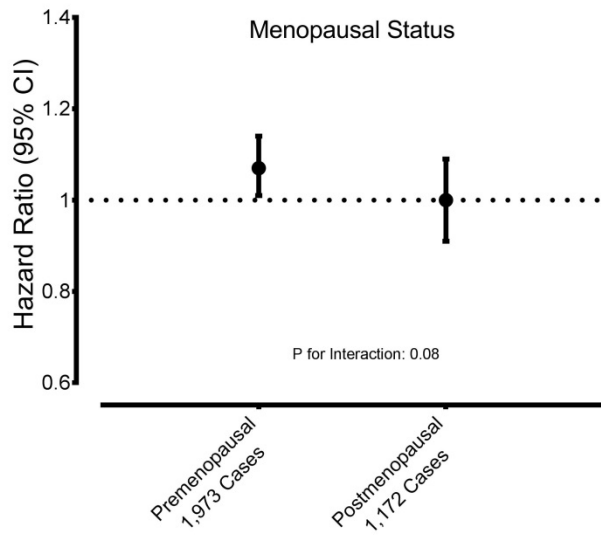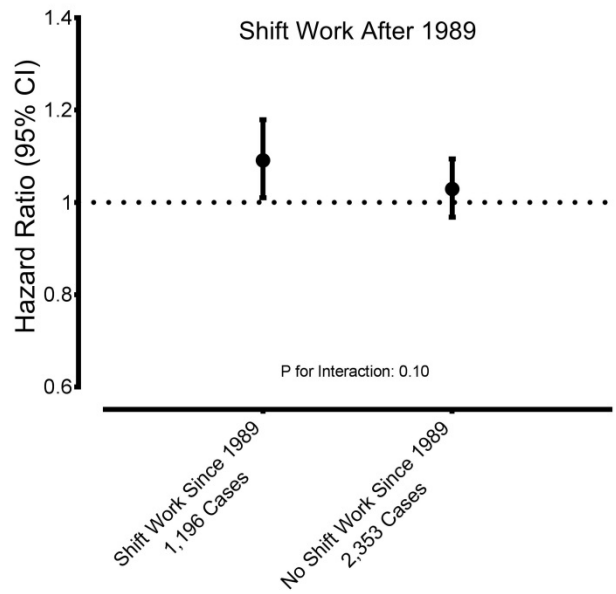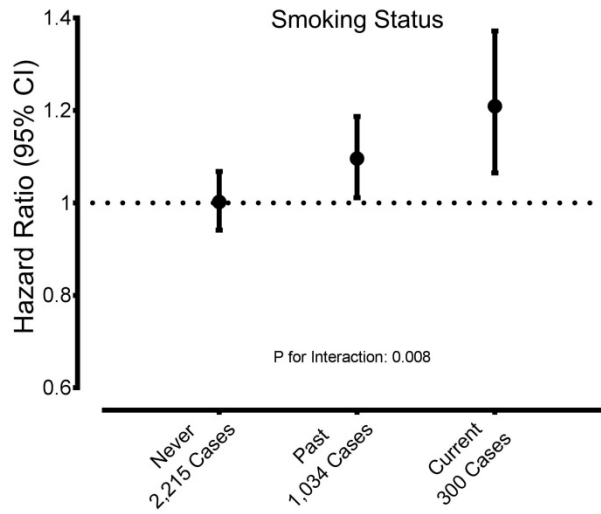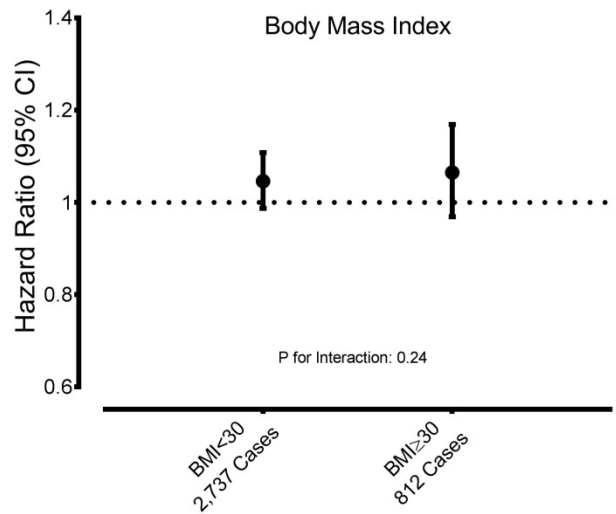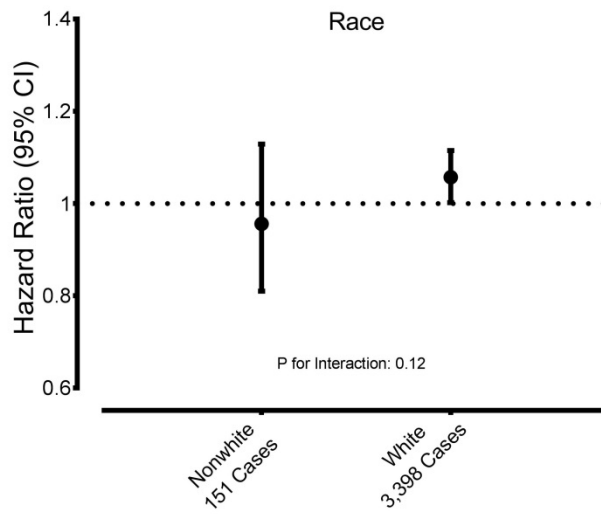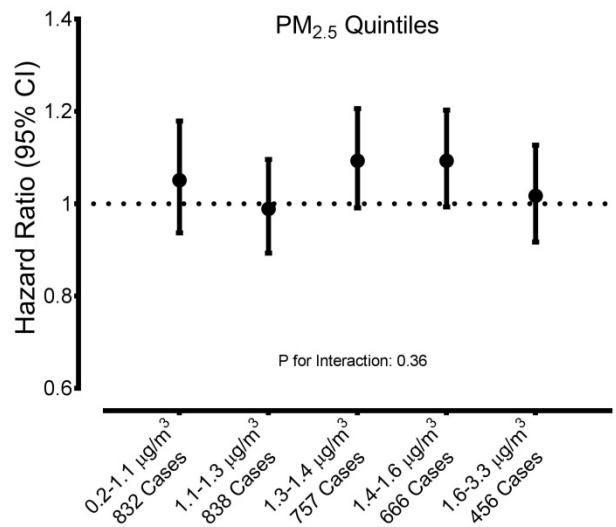

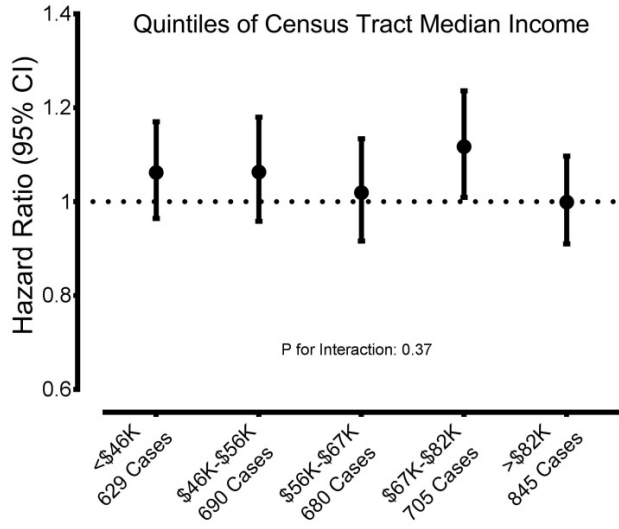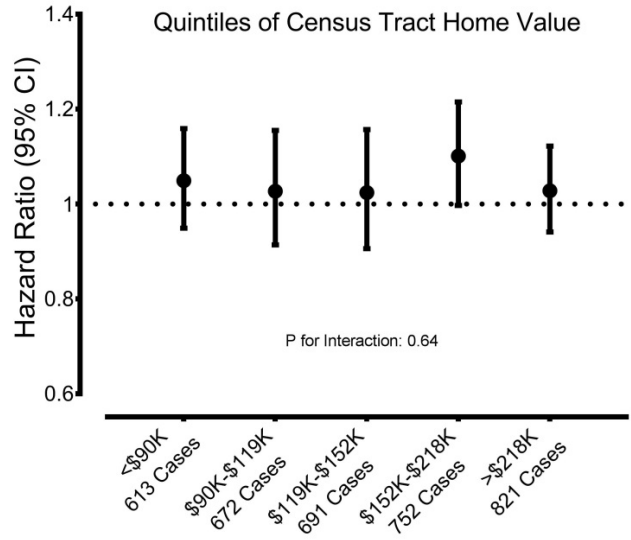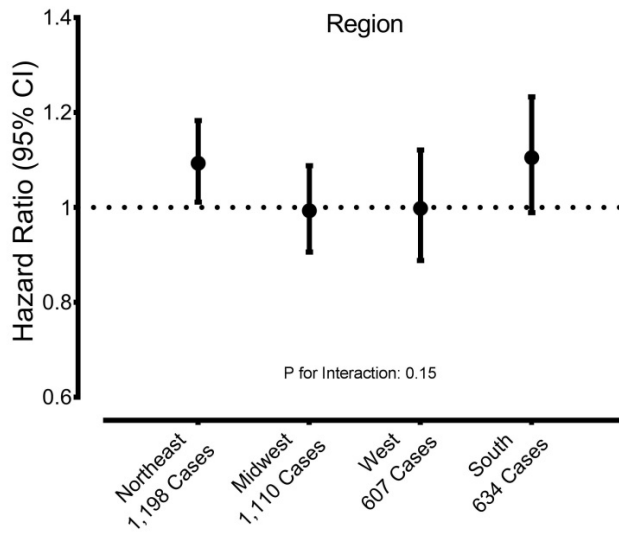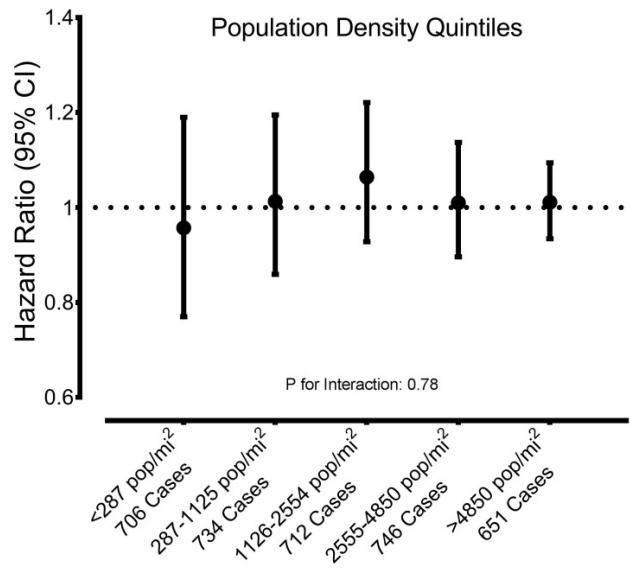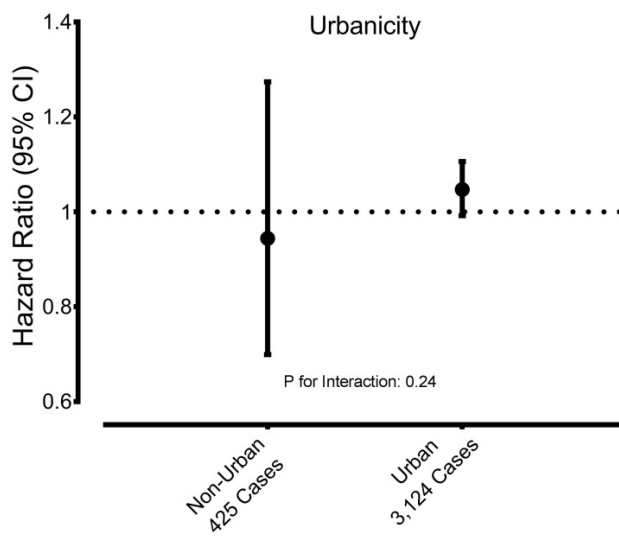

Supplement: EHP935.s001.acco.pdf [file EHP935.s001.acco.pdf]
